# Supplementary material for: Amino Acid Flux from Metabolic Network Benefits Protein Translation: the Role of Resource Availability
Source: PubMed Central journal article supplement (PMC4460870; doi:10.1038/srep11113), 2015-06-09
Supplement: srep11113-s1.pdf [file srep11113-s1.pdf]

## Supplementary Information:

# Amino Acid Flux from Metabolic Network Benefits Protein Translation: the Role of Resource Availability

Xiao-Pan Hu, Yi Yang, Bin-Guang Ma\*

Agricultural Bioinformatics Key Laboratory of Hubei Province, College of Informatics, Huazhong Agricultural University, Wuhan 430070, China

\* E-mail: [mbg@mail.hzau.edu.cn](mailto:mbg@mail.hzau.edu.cn)

**Figure S1.** The framework of amino acid supply estimation procedure.

**Figure S2.** Positive correlation between amino acid supply and gene expression.

**Figure S3.** The relationship between ribosome density and translation efficiency.

**Table S1.** Rand-based linear regression models for RD and TE.

**Supplementary Dataset 1.** Amino acid supply, translation efficiency and ribosome density data used in this work.

**Supplementary Dataset 2.** The ribosome density change (RD-change) under amino acid starvation for the analyzed *S. cerevisiae* genes.

**Figure S1.** The framework of amino acid supply estimation procedure.

### Step 1. Estimate growth rate $\mu$

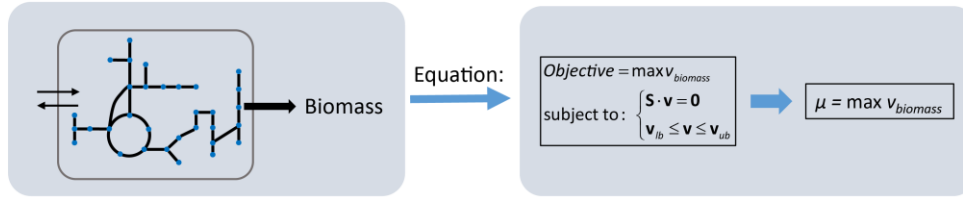

The growth rate  $\mu$  of the organism was estimated by maximizing the flux of biomass reaction ( $v_{biomass}$ ).

### Step 2. Estimate amino acid supply (AAS)

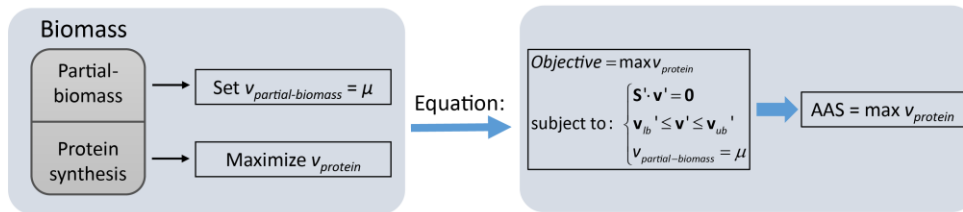

The biomass reaction was divided into partial-biomass and protein synthesis reaction.

The partial-biomass reaction contains a basal level (e.g. 30%) of amino acids synthesis (the stoichiometry of amino acids was set to 30% of the original ones in biomass) and keeps the stoichiometry of all the other compounds unchanged (the same to the original ones in the biomass function). Then, the flux of partial-biomass reaction ( $v_{partial-biomass}$ ) was set to  $\mu$  to ensure the organism grows under a reasonable and fixed rate. All the proteins shared the same partial-biomass reaction.

The protein synthesis reaction is protein-specific and only contains amino acids whose stoichiometry varies according to amino acid frequency of the studied protein. Here, we present a toy protein A as an example to show how to estimate amino acid supply. The amino acid frequency of protein A was shown in the table below.

| Amino acid | Frequency |
|------------|-----------|
| Ala-L      | 9%        |
| Arg-L      | 3%        |
| Asn-L      | 5%        |
| ...        | ...       |
| Val-L      | 11%       |

Based on the amino acid frequency, we can get the protein synthesis reaction of protein A:

$$0.09 \text{ Ala-L} + 0.03 \text{ Arg-L} + 0.05 \text{ Asn-L} + \dots + 0.11 \text{ Val-L} \Rightarrow \text{protein A}$$

By maximizing the flux of protein synthesis reaction (here,  $v_{protein-A}$ ), we can get the amino acid supply of protein A ( $AAS_A, AAS_A = \max v_{protein-A}$ ).

Through the two-step optimization, we get the amino acid supply for protein A ( $AAS_A$ ). By applying the second step for each protein in the proteome, we get the amino acid supply for all the proteins.

**Figure S2.** Positive correlation between amino acid supply and gene expression. Amino acid supply significantly correlates with mRNA expression level and protein abundance in both *E. coli* (A and C) and *S. cerevisiae* (B and D).

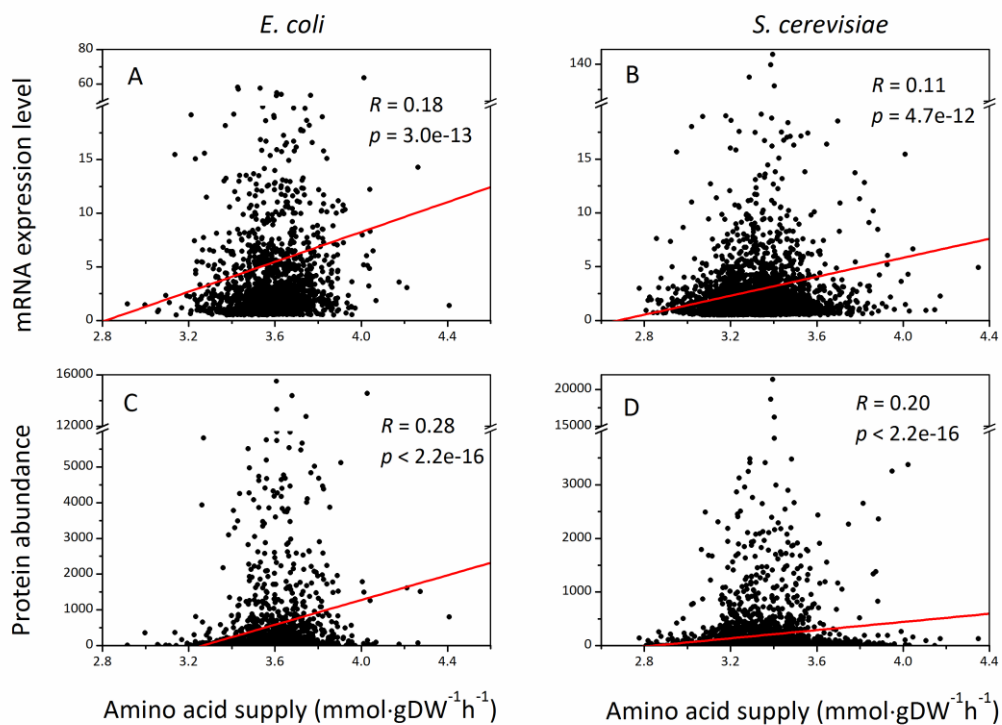

**Figure S3.** The relationship between ribosome density and translation efficiency.

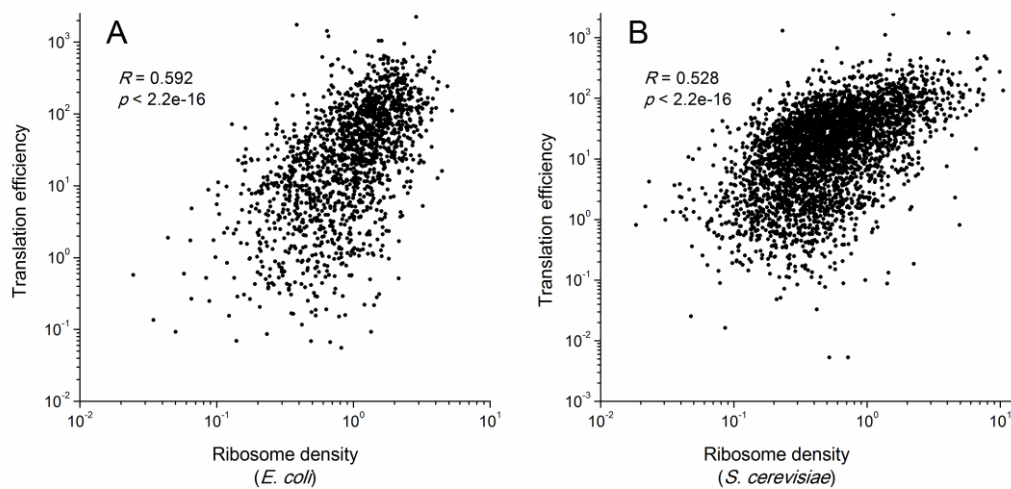

**Table S1.** Rank-based linear regression models for RD and TE**(A) The rank-based linear regression model for RD in *E. coli*<sup>a</sup>**

|           | Estimate | p-value  |
|-----------|----------|----------|
| Intercept | -1.27    | 3.03e-4  |
| CAI       | 2.90     | 2.2e-16  |
| AAS       | 0.32     | 1.26e-3  |
| FE        | 0.04     | 1.46e-14 |

<sup>a</sup> Multiple  $R = 0.49$  and  $p < 2.2e-16$ .**(B) The rank-based linear regression model for TE in *E. coli*<sup>b</sup>**

|           | Estimate | p-value |
|-----------|----------|---------|
| Intercept | -226.40  | 2.2e-16 |
| RD        | 27.42    | 2.2e-16 |
| CAI       | 250.84   | 2.2e-16 |
| AAS       | 35.90    | 1.46e-7 |

<sup>b</sup> Multiple  $R = 0.64$  and  $p < 2.2e-16$ .**(C) The rank-based linear regression model for RD in *S. cerevisiae*<sup>c</sup>**

|           | Estimate | p-value |
|-----------|----------|---------|
| Intercept | -2.03    | 2.2e-16 |
| CAI       | 2.67     | 2.2e-16 |
| AAS       | 0.57     | 2.2e-16 |

<sup>c</sup> Multiple  $R = 0.57$  and  $p < 2.2e-16$ .**(D) The rank-based linear regression model for TE in *S. cerevisiae*<sup>d</sup>**

|           | Estimate | p-value |
|-----------|----------|---------|
| Intercept | -38.42   | 1.35e-8 |
| RD        | 17.57    | 2.2e-16 |
| CAI       | 121.03   | 2.2e-16 |
| AAS       | 5.91     | 4.29e-3 |

<sup>d</sup> Multiple  $R = 0.63$  and  $p < 2.2e-16$ .
